# Supplementary material for: Elisabeth Vigée Le Brun e le sue suggestioni fiamminghe e olandesi
Source: PLOS journal article supplement (doi:10.1371/journal.pntd.0007494), 2000-01-01
Supplement: S4 (10.1371/journal.pntd.0007494.s004) [file journal.pntd.0007494.s004]

#### **S4 Text. Estimation of the Population Attributable Fraction (PAF)**

We calculated population attributable fractions (PAF) using standard formula to quantify the contribution of risk factors to functional illiteracy. We reported the PAF only for those predictor variables that were found positively and significantly associated with the prevalence of functional illiteracy in our multinomial logistic regression models. For instance, we estimated the PAF of functional illiteracy explained by *P. vivax* infection, and *T. trichiura* monoinfection, separately from Model 5. we used the following standard formula:

$$PAF_1 = \frac{P_1(RRR_1 - 1)}{P_1(RRR_1 - 1) + 1}$$

where  $P_1$  is the mean prevalence of one parasite in the 10 – 19 age group, and  $RRR_1$  is the prevalence-specific ratios of relative risks (RRR).
