# Supplementary material for: Elisabeth Vigée Le Brun e le sue suggestioni fiamminghe e olandesi
Source: PLOS journal article supplement (doi:10.1371/journal.pntd.0007494), 2000-01-01
Supplement: S13 (10.1371/journal.pntd.0007494.s013) [file journal.pntd.0007494.s013]

| Region      | Observed                                                                           | Model 1                                                                            | Model 2                                                                             | Model 3                                                                              | Model 4                                                                              | Model 5                                                                              |
|-------------|------------------------------------------------------------------------------------|------------------------------------------------------------------------------------|-------------------------------------------------------------------------------------|--------------------------------------------------------------------------------------|--------------------------------------------------------------------------------------|--------------------------------------------------------------------------------------|
| Luzon       | 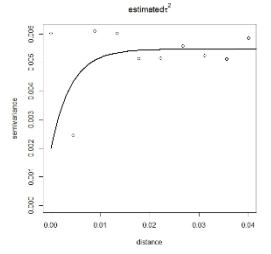  |   |   |   |   |   |
| The Visayas |   | N/A                                                                                |   |   |   |   |
| Mindanao    |  |  |  |  |  |  |
