# Supplementary material for: Elisabeth Vigée Le Brun e le sue suggestioni fiamminghe e olandesi
Source: PLOS journal article supplement (doi:10.1371/journal.pntd.0007494), 2000-01-01
Supplement: S18 (10.1371/journal.pntd.0007494.s018) [file journal.pntd.0007494.s018]

| Variables                    |                                                            | Regions            |                          |                       |
|------------------------------|------------------------------------------------------------|--------------------|--------------------------|-----------------------|
|                              |                                                            | Luzon<br>(n=5,791) | The Visayas<br>(n=1,673) | Mindanao<br>(n=2,875) |
| Age                          | Average age (Standard deviation)                           | 42.1 (12.2)        | 42.2 (12.2)              | 39.9 (12.2)           |
| Sex                          | Male                                                       | 2,900 (50.1)       | 910 (54.4)               | 1,499 (52.1)          |
|                              | Female                                                     | 2,891 (49.9)       | 763 (45.6)               | 1,376 (47.9)          |
| Marital status               | Single                                                     | 842 (14.5)         | 286 (17.1)               | 487 (16.9)            |
|                              | Married                                                    | 4,454 (76.9)       | 1,286 (75.8)             | 2,210 (76.9)          |
|                              | Widow                                                      | 349 (6.0)          | 95 (5.7)                 | 130 (4.5)             |
|                              | Divorced                                                   | 146 (2.5)          | 24 (1.4)                 | 48 (1.7)              |
| Functional literacy level    | Functional literate                                        | 2,979 (51.4)       | 582 (35)                 | 1,075 (37.4)          |
|                              | Moderate functional literate                               | 1,940 (33.5)       | 664 (40.0)               | 1,138 (39.6)          |
|                              | Low functional literate                                    | 520 (9.0)          | 180 (10.0)               | 232 (8.0)             |
|                              | Functional illiterate                                      | 352 (6.1)          | 247 (15.0)               | 430 (15.0)            |
| Highest education attainment | No grade completed                                         | 82 (1.4)           | 56 (3.4)                 | 197 (6.9)             |
|                              | Elementary school                                          | 3,755 (64.8)       | 1,160 (69.3)             | 1,702 (59.2)          |
|                              | High school level or higher                                | 1,954 (33.7)       | 457 (27.3)               | 976 (33.9)            |
| Occupation                   | Worked for private household                               | 1787 (30.8)        | 485 (29)                 | 707 (24.6)            |
|                              | Worked for government                                      | 94 (1.6)           | 33 (2.0)                 | 72 (2.5)              |
|                              | Worked with pay on own family-operated farm or business    | 1,890 (32.6)       | 647 (38.7)               | 1,037 (36.1)          |
|                              | Worked without pay on own family-operated farm or business | 544 (9.4)          | 189 (11.3)               | 395 (13.7)            |
|                              | Unemployed                                                 | 1,476 (25.6)       | 319 (19.0)               | 664 (23.1)            |

Note: Unless otherwise indicated, values represent the absolute number followed by the percentage within parentheses.
